# Supplementary material for: Alterations in the Colonic Microbiota in Response to Osmotic Diarrhea
Source: PLoS One. 2013 Feb 8;8(2):e55817. doi: 10.1371/journal.pone.0055817 (PMC3568139; doi:10.1371/journal.pone.0055817)
Supplement: Table S2 — Read and OTU numbers. (XLSX) [file pone.0055817.s005.xlsx]

## Sheet: Tabelle1
Sample	Sequences	OTU_0.00	OTU_0.01	OTU_0.02	OTU_0.03	OTU_0.04	OTU_0.05
AF1	19156	1050	925	663	552	481	436
AF2	17298	812	739	542	466	403	370
AF3	16111	558	506	333	273	231	218
AF4	12939	545	487	347	293	263	245
Total A	65504	2079	1724	1071	859	713	628
BF1	18791	553	504	358	290	254	235
BF2	19492	679	601	435	354	298	270
BF3	22649	643	590	395	303	254	233
BF4	23349	825	744	498	371	306	272
BM2	26718	2013	1759	1038	658	485	422
BM3	27587	1608	1426	854	522	359	309
Total B	138586	2544	2042	1205	893	727	623
CF1	17121	852	734	515	409	343	302
CF2	16751	717	636	436	347	290	263
CF3	21067	388	331	219	168	141	128
CF4	17796	386	357	250	193	161	152
CM2	26240	1720	1521	886	555	396	337
CM3	24482	1517	1347	816	502	347	286
Total C	123457	3671	3007	1730	1253	1021	889
DF1	11151	904	781	593	498	445	403
DF2	18965	1235	1069	757	630	550	493
DF3	22918	753	688	484	371	316	291
DF4	22030	873	768	554	440	376	338
DM2	25998	1883	1673	954	634	465	408
DM3	23754	1610	1393	784	455	311	260
Total D	124816	7949	6152	2743	1628	1179	999
Total	452363	14131	10501	4766	3059	2251	1853
