# Supplementary material for: Alterations in the Colonic Microbiota in Response to Osmotic Diarrhea
Source: PLoS One. 2013 Feb 8;8(2):e55817. doi: 10.1371/journal.pone.0055817 (PMC3568139; doi:10.1371/journal.pone.0055817)
Supplement: Table S3 — Richness, diversity and evenness. (XLS) [file pone.0055817.s006.xls]

## Sheet: Sheet1
Sample	Richness	Diversity	Eveness	Chao1	ACE
AF1	552	3.8	0.6	980.47	944.81
AF2	466	2.91	0.47	801	774.75
AF3	273	2.9	0.52	448.78	451.61
AF4	293	2.26	0.4	445.62	431.8
BF1	290	3.03	0.53	490.52	455.96
BF2	354	3.36	0.57	599.44	601.47
BF3	303	3.1	0.54	460.1	457.74
BF4	371	3.39	0.57	632.73	584.88
BM2	658	3.46	0.53	969.58	917.8
BM3	522	2.73	0.44	725.3	699.58
CF1	409	3.66	0.61	556.35	621.22
CF2	347	3.26	0.56	506.6	537.73
CF3	168	2.16	0.42	269.67	261.13
CF4	193	2.33	0.44	256.09	283.76
CM2	555	2.96	0.47	809.53	748.31
CM3	502	2.81	0.45	705.12	685.15
DF1	498	4.35	0.7	794.12	832.88
DF2	630	4.38	0.68	982.45	1076.34
DF3	371	3.12	0.53	583.52	594.87
DF4	440	3.53	0.58	699.55	699.87
DM2	634	3.41	0.53	1055.67	1025.58
DM3	455	2.96	0.48	635.96	593.01
Comparison (P)	Richness	Diversity	Eveness	Chao1	ACE
F: TP1 vs. TP2	0.8317	0.4486	0.3284	0.8491	0.7489
F: TP2 vs. TP3	0.0295	0.1205	0.231	0.017	0.0218
F: TP3 vs. TP4	0.042	0.8303	0.9251	0.2329	0.1873
M: TP2 vs. TP3	0.0801	0.1202	0.1579	0.1069	0.1564
TP2: F vs. M	0.1913	0.3352	0.101	0.1095	0.283
TP3: F vs. M	0.0989	0.9067	0.423	0.1517	0.2147
