# Supplementary material for: Alterations in the Colonic Microbiota in Response to Osmotic Diarrhea
Source: PLoS One. 2013 Feb 8;8(2):e55817. doi: 10.1371/journal.pone.0055817 (PMC3568139; doi:10.1371/journal.pone.0055817)
Supplement: Table S7 — Stable phylotypes. (XLS) [file pone.0055817.s010.xls]

## Sheet: Stable stools
Phylotype ID (OTU0.03)	Individual	Relative abundance at tp2 [%]	Relative abundance at tp3 [%]	CV	Taxonomic classification (nearest neighbor)	Comment
OTU_1199_0.03	A	0.0693722	0.0682763	1.12589	Bacteria;100;Firmicutes; 96;Clostridia; 96;Clostridiales; 96;Lachnospiraceae; 94;Lachnospira; 28
OTU_351_0.03	B	0.0359122	0.0353216	1.17237	Bacteria;100;Proteobacteria;100;Deltaproteobacteria;100;Desulfovibrionales;100;Desulfovibrionaceae;100;Bilophila;100
OTU_97_0.03	B	0.513031	0.485673	3.87407	Bacteria;100;Bacteroidetes; 98;Bacteroidetes; 94;Bacteroidales; 94;Bacteroidaceae; 84;Bacteroides; 84
OTU_1065_0.03	B	0.0615637	0.0662281	5.16185	Bacteria;100;Firmicutes; 57;Clostridia; 57;Clostridiales; 55;Ruminococcaceae; 28;Ruminococcaceae Incertae Sedis; 28
OTU_720_0.03	B	0.0359122	0.0397369	7.15002	Bacteria;100;Firmicutes; 98;Clostridia; 97;Clostridiales; 96;Lachnospiraceae; 88;Dorea; 47
OTU_33_0.03	B	16.7761	14.9808	7.995	Bacteria;100;Bacteroidetes;100;Bacteroidetes;100;Bacteroidales;100;Bacteroidaceae;100;Bacteroides;100	top abundant
OTU_1199_0.03	B	0.179561	0.158947	8.61184	Bacteria;100;Firmicutes; 96;Clostridia; 96;Clostridiales; 96;Lachnospiraceae; 94;Lachnospira; 28
OTU_1_0.03	C	0.752194	0.683533	6.76316	Bacteria;100;Firmicutes; 95;Clostridia; 92;Clostridiales; 92;Lachnospiraceae; 85;Lachnospira; 38
OTU_913_0.03	C	0.0955167	0.0854417	7.87375	Bacteria;100;Firmicutes; 96;Clostridia; 89;Clostridiales; 88;Clostridiaceae; 86;Sarcina; 39
OTU_171_0.03	C	0.429825	0.384488	7.87375	Bacteria;100;Firmicutes; 80;Clostridia; 74;Clostridiales; 71;Lachnospiraceae; 60;Parasporobacterium; 17
OTU_4348_0.03	C	0.0835771	0.0949352	8.99814	Bacteria;100;Firmicutes; 83;Clostridia; 83;Clostridiales; 83;Lachnospiraceae; 72;Catonella; 24
OTU_425_0.03	D	0.216188	0.218169	0.645123	Bacteria;100;Firmicutes;100;Clostridia; 99;Clostridiales; 99;Lachnospiraceae; 99;Roseburia; 80
OTU_1867_0.03	D	0.922752	0.872676	3.94435	Bacteria;100;Firmicutes; 84;Clostridia; 84;Clostridiales; 84;Ruminococcaceae; 74;Faecalibacterium; 54
OTU_317_0.03	D	0.137095	0.148355	5.57876	Bacteria;100;Bacteroidetes; 98;Bacteroidetes; 96;Bacteroidales; 96;Bacteroidaceae; 95;Bacteroides; 95
OTU_45_0.03	D	0.0316372	0.0349071	6.94912	Bacteria; 99;Firmicutes; 82;Clostridia; 82;Clostridiales; 80;Lachnospiraceae; 77;Syntrophococcus; 56
OTU_1248_0.03	D	0.042183	0.0479972	9.11794	Bacteria;100;Firmicutes; 97;Clostridia; 93;Clostridiales; 93;Lachnospiraceae; 89;Pseudobutyrivibrio; 21

## Sheet: Stable mucosa
Phylotype ID (OTU0.03)	Individual	Relative abundance at tp2 [%]	Relative abundance at tp3 [%]	CV	Taxonomic classification (nearest neighbor)	Comment
OTU_207_0.03	B	0.0711131	0.068873	2.26305	Bacteria; 99;Firmicutes; 96;Bacilli; 96;Lactobacillales; 95;Lactobacillaceae; 92;Lactobacillus; 85
OTU_1576_0.03	B	0.0261996	0.0253743	2.26305	Bacteria;100;Firmicutes;100;Bacilli;100;Lactobacillales;100;Leuconostocaceae; 94;Weissella; 94
OTU_859_0.03	B	0.0299424	0.0289992	2.26305	Bacteria;100;Proteobacteria;100;Betaproteobacteria;100;Burkholderiales;100;Comamonadaceae;100;Acidovorax; 70
OTU_2810_0.03	B	0.0224568	0.0217494	2.26305	Bacteria;100;Firmicutes; 97;Bacilli; 96;Lactobacillales; 96;Leuconostocaceae; 93;Weissella; 93
OTU_4505_0.03	B	0.0449135	0.0434987	2.26305	Bacteria;100;Firmicutes; 96;Bacilli; 96;Lactobacillales; 96;Leuconostocaceae; 89;Weissella; 89
OTU_953_0.03	B	0.0523991	0.0543734	2.61499	Bacteria;100;Proteobacteria;100;Betaproteobacteria;100;Burkholderiales;100;Comamonadaceae;100;Acidovorax; 82
OTU_1376_0.03	B	0.0336852	0.036249	5.18454	Bacteria;100;Firmicutes;100;Bacilli;100;Lactobacillales;100;Leuconostocaceae; 96;Weissella; 96
OTU_93_0.03	B	0.0598847	0.0543734	6.82151	Bacteria;100;Firmicutes; 99;Bacilli; 99;Lactobacillales; 99;Leuconostocaceae; 97;Weissella; 97
OTU_3205_0.03	B	0.0486563	0.0543734	7.84744	Bacteria;100;Firmicutes; 98;Bacilli; 98;Lactobacillales; 98;Leuconostocaceae; 89;Weissella; 88
OTU_1107_0.03	B	0.0486563	0.0434987	7.91484	Bacteria;100;Firmicutes; 97;Bacilli; 97;Lactobacillales; 97;Leuconostocaceae; 91;Weissella; 91
OTU_644_0.03	C	0.224848	0.224655	0.0606307	Bacteria;100;Firmicutes; 99;Bacilli; 98;Lactobacillales; 98;Leuconostocaceae; 87;Weissella; 86
OTU_16_0.03	C	1.12043	1.1437	1.45352	Bacteria;100;Firmicutes;100;Bacilli;100;Lactobacillales;100;Leuconostocaceae; 91;Weissella; 90
OTU_1690_0.03	C	0.0838415	0.0816927	1.83578	Bacteria;100;Proteobacteria;100;Gammaproteobacteria;100;Enterobacteriales;100;Enterobacteriaceae;100;Raoultella; 28
OTU_2596_0.03	C	0.0419207	0.0408463	1.83578	Bacteria;100;Firmicutes;100;Bacilli; 99;Lactobacillales; 99;Leuconostocaceae; 96;Weissella; 96
OTU_130_0.03	C	2.37043	2.43853	2.00266	Bacteria;100;Firmicutes; 99;Bacilli; 99;Lactobacillales; 99;Leuconostocaceae; 97;Weissella; 97
OTU_2_0.03	C	1.2843	1.33159	2.55671	Bacteria;100;Firmicutes;100;Bacilli;100;Lactobacillales;100;Leuconostocaceae; 96;Weissella; 96
OTU_158_0.03	C	0.251524	0.261417	2.72734	Bacteria;100;Proteobacteria;100;Betaproteobacteria;100;Burkholderiales;100;Comamonadaceae; 99;Acidovorax; 88
OTU_24_0.03	C	10.6479	11.1347	3.1608	Bacteria;100;Firmicutes;100;Bacilli;100;Lactobacillales;100;Leuconostocaceae; 99;Weissella; 99	top abundant
OTU_1045_0.03	C	0.0342988	0.0326771	3.42429	Bacteria;100;Firmicutes;100;Bacilli; 97;Lactobacillales; 97;Leuconostocaceae; 85;Weissella; 85
OTU_61_0.03	C	42.763	44.9922	3.59259	Bacteria;100;Firmicutes;100;Bacilli;100;Lactobacillales;100;Leuconostocaceae; 84;Weissella; 82	top abundant
OTU_1404_0.03	C	0.221037	0.232824	3.67295	Bacteria;100;Firmicutes;100;Bacilli;100;Lactobacillales;100;Leuconostocaceae; 94;Weissella; 94
OTU_115_0.03	C	1.47485	1.55625	3.79777	Bacteria;100;Firmicutes; 99;Bacilli; 99;Lactobacillales; 99;Streptococcaceae; 98;Lactococcus; 98
OTU_212_0.03	C	1.27287	1.20088	4.11522	Bacteria;100;Firmicutes;100;Bacilli;100;Lactobacillales;100;Streptococcaceae;100;Streptococcus;100
OTU_1393_0.03	C	0.0228659	0.0245078	4.9016	Bacteria;100;Firmicutes;100;Bacilli; 99;Lactobacillales; 99;Leuconostocaceae; 94;Weissella; 94
OTU_1082_0.03	C	0.0266768	0.0285924	4.9016	Bacteria;100;Firmicutes; 99;Bacilli; 99;Lactobacillales; 99;Streptococcaceae; 96;Lactococcus; 90
OTU_4128_0.03	C	0.0533537	0.0571849	4.9016	Bacteria;100;Firmicutes; 99;Bacilli; 99;Lactobacillales; 99;Leuconostocaceae; 98;Weissella; 98
OTU_2101_0.03	C	0.0876524	0.0939466	4.9016	Bacteria;100;Firmicutes;100;Bacilli;100;Lactobacillales;100;Streptococcaceae;100;Lactococcus;100
OTU_106_0.03	C	0.712652	0.763826	4.9016	Bacteria;100;Firmicutes; 98;Bacilli; 92;Lactobacillales; 92;Streptococcaceae; 90;Lactococcus; 89
OTU_1237_0.03	C	0.0304878	0.0326771	4.9016	Bacteria;100;Firmicutes;100;Bacilli;100;Lactobacillales;100;Leuconostocaceae; 93;Weissella; 93
OTU_681_0.03	C	0.144817	0.134793	5.07003	Bacteria;100;Firmicutes; 98;Bacilli; 98;Lactobacillales; 97;Streptococcaceae; 97;Lactococcus; 92
OTU_11_0.03	C	4.05488	3.76603	5.22305	Bacteria;100;Firmicutes; 99;Bacilli; 99;Lactobacillales; 99;Streptococcaceae; 98;Lactococcus; 90
OTU_1221_0.03	C	0.0266768	0.0245078	5.99295	Bacteria;100;Actinobacteria; 99;Actinobacteria; 99;Actinomycetales; 99;Propionibacteriaceae; 72;Propionimicrobium; 50
OTU_3016_0.03	C	0.0266768	0.0245078	5.99295	Bacteria;100;Proteobacteria;100;Betaproteobacteria;100;Rhodocyclales; 93;Rhodocyclaceae; 93;Thauera; 90
OTU_1235_0.03	C	0.23628	0.257332	6.03129	Bacteria;100;Proteobacteria;100;Gammaproteobacteria;100;Enterobacteriales;100;Enterobacteriaceae;100;Citrobacter; 56
OTU_1368_0.03	C	0.0228659	0.0204232	7.98004	Bacteria;100;Firmicutes; 93;Bacilli; 86;Lactobacillales; 85;Streptococcaceae; 81;Lactococcus; 80
OTU_3940_0.03	C	0.0228659	0.0204232	7.98004	Bacteria;100;Firmicutes; 77;Bacilli; 71;Lactobacillales; 69;Leuconostocaceae; 52;Weissella; 51
OTU_2005_0.03	C	0.0838415	0.0939466	8.0381	Bacteria;100;Bacteroidetes;100;Flavobacteria; 97;Flavobacteriales; 97;Flavobacteriaceae; 93;Formosa; 46
OTU_773_0.03	C	0.362043	0.322686	8.12857	Bacteria;100;Firmicutes;100;Bacilli;100;Lactobacillales;100;Streptococcaceae; 99;Lactococcus; 99
OTU_1209_0.03	C	0.0762195	0.0857773	8.34384	Bacteria;100;Bacteroidetes; 92;Bacteroidetes; 89;Bacteroidales; 89;Prevotellaceae; 84;Prevotella; 70
OTU_2401_0.03	C	0.0876524	0.077608	8.59548	Bacteria;100;Firmicutes;100;Bacilli;100;Lactobacillales;100;Streptococcaceae;100;Streptococcus;100
OTU_272_0.03	C	0.0647866	0.0571849	8.8139	Bacteria;100;Bacteroidetes; 96;Bacteroidetes; 95;Bacteroidales; 95;Bacteroidaceae; 91;Bacteroides; 91
OTU_152_0.03	C	0.0419207	0.0367617	9.27268	Bacteria;100;Firmicutes; 99;Bacilli; 98;Lactobacillales; 98;Streptococcaceae; 97;Lactococcus; 97
OTU_941_0.03	D	0.0384645	0.0420982	6.37863	Bacteria;100;Firmicutes; 97;Bacilli; 96;Lactobacillales; 96;Leuconostocaceae; 93;Weissella; 93
OTU_2112_0.03	D	0.0884683	0.0968258	6.37863	Bacteria;100;Firmicutes; 99;Bacilli; 99;Lactobacillales; 99;Leuconostocaceae; 94;Weissella; 94
