# Supplementary material for: Alterations in the Colonic Microbiota in Response to Osmotic Diarrhea
Source: PLoS One. 2013 Feb 8;8(2):e55817. doi: 10.1371/journal.pone.0055817 (PMC3568139; doi:10.1371/journal.pone.0055817)
Supplement: Table S12 — Significantly changing stool phylotypes identified by edgeR. (XLS) [file pone.0055817.s015.xls]

## Sheet: Differential OTUs
Ref_OTU	AF2	BF2	CF2	DF2	AF3	BF3	CF3	DF3	logConc	logFC	PValue	FDR	Classification
OTU_144	2	75	18	17	0	0	0	0	-7.09264	-14.0813	0.00843853	0.870427	Bacteria;100;Firmicutes; 99;Clostridia; 99;Clostridiales; 99;Lachnospiraceae; 99;Lachnospira; 79
OTU_95	4	14	26	18	0	0	0	0	-7.68171	-13.1955	0.00978401	0.870427	Bacteria;100;Firmicutes; 99;Clostridia; 99;Clostridiales; 99;Lachnospiraceae; 97;Dorea; 54
OTU_89	273	235	1236	830	4	0	0	46	-3.93639	-8.735	0.0156233	0.870427	Bacteria;100;Firmicutes; 98;Clostridia; 98;Clostridiales; 98;Lachnospiraceae; 90;Pseudobutyrivibrio; 36
OTU_1005	7	44	30	80	0	0	0	2	-6.36223	-8.36228	0.0157312	0.870427	Bacteria; 99;Bacteroidetes; 97;Bacteroidetes; 67;Bacteroidales; 67;Rikenellaceae; 67;Alistipes; 67
OTU_2361	48	0	9	27	0	0	0	0	-7.47514	-13.2082	0.018118	0.870427	Bacteria;100;Firmicutes; 74;Clostridia; 74;Clostridiales; 74;Ruminococcaceae; 57;Faecalibacterium; 41
OTU_338	28	1	5	12	0	0	0	0	-7.78513	-12.6604	0.0184928	0.870427	Bacteria;100;Firmicutes; 98;Clostridia; 98;Clostridiales; 98;Lachnospiraceae; 98;Roseburia; 95
OTU_32	1	13	12	10	0	0	0	0	-8.03025	-12.3979	0.0185285	0.870427	Bacteria;100;Firmicutes; 66;Clostridia; 64;Clostridiales; 64;Ruminococcaceae; 48;Faecalibacterium; 44
OTU_1732	2	6	14	10	0	0	0	0	-8.80615	-12.2541	0.0186509	0.870427	Bacteria;100;Firmicutes; 76;Clostridia; 72;Clostridiales; 71;Incertae Sedis XIII; 28;Anaerovorax; 28
OTU_783	11	31	0	14	0	0	0	0	-7.78349	-12.9214	0.0204668	0.870427	Bacteria;100;Firmicutes; 84;Clostridia; 83;Clostridiales; 83;Ruminococcaceae; 52;Sporobacter; 17
OTU_92	4	2	405	0	0	0	0	0	-5.79025	-15.2476	0.0210227	0.870427	Bacteria; 99;Firmicutes; 54;Clostridia; 49;Clostridiales; 48;Incertae Sedis XV; 24;Aminobacterium; 22
OTU_1156	17	6	0	30	0	0	0	0	-7.48569	-12.6096	0.0228556	0.870427	Bacteria;100;Firmicutes;100;Clostridia;100;Clostridiales;100;Ruminococcaceae;100;Acetanaerobacterium; 66
OTU_1171	15	53	93	109	0	1	0	5	-5.83558	-7.16589	0.0232799	0.870427	Bacteria;100;Proteobacteria; 52;Alphaproteobacteria; 30;Sphingomonadales; 14;Sphingomonadaceae; 14;Sphingosinicella; 12
OTU_1660	7	0	16	26	0	0	0	0	-8.38006	-12.3229	0.0253907	0.870427	Bacteria; 99;Bacteroidetes; 97;Bacteroidetes; 49;Bacteroidales; 49;Bacteroidaceae; 31;Bacteroides; 31
OTU_194	326	469	242	831	14	3	0	50	-4.33809	-6.6346	0.0322621	0.870427	Bacteria;100;Bacteroidetes;100;Bacteroidetes;100;Bacteroidales;100;Rikenellaceae;100;Alistipes;100
OTU_1726	66	3	0	113	0	0	0	1	-7.0624	-8.34881	0.0338102	0.870427	Bacteria;100;Firmicutes; 74;Clostridia; 67;Clostridiales; 66;Ruminococcaceae; 61;Faecalibacterium; 28
OTU_3007	53	0	0	43	0	0	0	0	-7.04942	-13.1665	0.0376289	0.870427	Bacteria;100;Firmicutes; 63;Clostridia; 62;Clostridiales; 62;Ruminococcaceae; 40;Faecalibacterium; 24
OTU_1983	26	0	0	68	0	0	0	0	-7.36266	-13.0259	0.0400863	0.870427	Bacteria;100;Firmicutes; 84;Clostridia; 83;Clostridiales; 83;Ruminococcaceae; 72;Faecalibacterium; 44
OTU_246	8	6	13	13	0	1	0	0	-8.19238	-6.86035	0.0406199	0.870427	Bacteria;100;Firmicutes; 56;Clostridia; 52;Clostridiales; 33;Lachnospiraceae; 16;Sporobacterium; 2
OTU_1959	3	1	7	2	0	0	0	0	-9.341	-10.8925	0.0441871	0.870427	Bacteria;100;Firmicutes; 95;Clostridia; 95;Clostridiales; 95;Ruminococcaceae; 50;Faecalibacterium; 23
OTU_16	0	0	0	0	4	6	6	1	-9.43867	10.7626	0.0447087	0.870427	Bacteria;100;Firmicutes;100;Bacilli;100;Lactobacillales;100;Leuconostocaceae; 91;Weissella; 90
OTU_3057	4	0	6	10	0	0	0	0	-8.61804	-11.1006	0.0466891	0.870427	Bacteria;100;Bacteroidetes;100;Bacteroidetes; 99;Bacteroidales; 99;Rikenellaceae; 99;Alistipes; 99
OTU_2034	22	0	0	37	0	0	0	0	-7.82842	-12.3637	0.0487883	0.870427	Bacteria;100;Firmicutes; 68;Clostridia; 66;Clostridiales; 63;Ruminococcaceae; 54;Faecalibacterium; 38
OTU_904	22	0	4	114	0	0	0	2	-6.85302	-7.20518	0.0520068	0.870427	Bacteria;100;Firmicutes; 65;Clostridia; 63;Clostridiales; 63;Lachnospiraceae; 54;Shuttleworthia; 15
OTU_466	46	9	0	43	0	0	0	2	-7.70627	-7.2505	0.0544628	0.870427	Bacteria;100;Firmicutes; 75;Clostridia; 69;Clostridiales; 66;Ruminococcaceae; 47;Ethanoligenens; 37
OTU_2142	16	0	26	0	0	0	0	0	-8.16828	-12.0921	0.0549349	0.870427	Bacteria;100;Firmicutes;100;Clostridia;100;Clostridiales;100;Ruminococcaceae;100;Ruminococcus;100
OTU_1472	45	31	12	12	22	0	0	0	-7.00712	-7.24833	0.0566882	0.870427	Bacteria;100;Firmicutes; 66;Clostridia; 64;Clostridiales; 64;Ruminococcaceae; 42;Faecalibacterium; 38
OTU_2110	0	5	2	7	0	0	0	0	-9.2669	-10.7831	0.0577035	0.870427	Bacteria;100;Firmicutes; 56;Clostridia; 56;Clostridiales; 53;Lachnospiraceae; 39;Sporobacterium; 12
OTU_3333	2	1	1	5	0	0	0	0	-9.41655	-10.3495	0.0614628	0.870427	Bacteria;100;Firmicutes; 80;Clostridia; 77;Clostridiales; 76;Lachnospiraceae; 25;Lachnobacterium; 21
OTU_334	0	0	0	0	1	0	22	4	-8.31793	11.3724	0.0615926	0.870427	Bacteria;100;Firmicutes; 85;Clostridia; 85;Clostridiales; 85;Veillonellaceae; 83;Veillonella; 82
OTU_1600	0	169	0	1	0	0	0	0	-7.13608	-14.4795	0.0624974	0.870427	Bacteria; 97;Bacteroidetes; 91;Bacteroidetes; 73;Bacteroidales; 73;Porphyromonadaceae; 62;Paludibacter; 42
OTU_1032	13	0	26	93	0	0	0	5	-6.536	-6.86431	0.0625137	0.870427	Bacteria; 99;Firmicutes; 76;Clostridia; 74;Clostridiales; 74;Ruminococcaceae; 60;Faecalibacterium; 37
OTU_1494	0	2	8	3	0	0	0	0	-9.24619	-10.6138	0.0634308	0.870427	Bacteria;100;Firmicutes; 94;Clostridia; 94;Clostridiales; 94;Lachnospiraceae; 54;Pseudobutyrivibrio; 34
OTU_222	69	116	41	58	1	14	0	6	-6.18564	-5.25268	0.0672969	0.870427	Bacteria; 99;Bacteroidetes; 95;Bacteroidetes; 56;Bacteroidales; 56;Bacteroidaceae; 38;Bacteroides; 38
OTU_1079	2	8	0	2	0	0	0	0	-8.97108	-10.7819	0.0681087	0.870427	Bacteria;100;Firmicutes;100;Clostridia;100;Clostridiales; 98;Lachnospiraceae; 95;Lachnospiraceae Incertae Sedis; 32
OTU_507	147	0	0	1	0	0	0	0	-7.31423	-13.657	0.0707727	0.870427	Bacteria;100;Firmicutes; 74;Clostridia; 71;Clostridiales; 71;Ruminococcaceae; 56;Anaerotruncus; 45
OTU_4656	2	4	3	0	0	0	0	0	-10.1142	-10.522	0.0708134	0.870427	Bacteria;100;Firmicutes;100;Clostridia;100;Clostridiales;100;Ruminococcaceae;100;Faecalibacterium; 74
OTU_5056	5	0	4	2	0	0	0	0	-9.91354	-10.3116	0.0716896	0.870427	Bacteria;100;Bacteroidetes;100;Bacteroidetes; 99;Bacteroidales; 99;Rikenellaceae; 99;Alistipes; 99
OTU_1448	3	0	11	1	0	0	0	0	-9.10309	-10.7526	0.0728009	0.870427	Bacteria;100;Firmicutes; 97;Clostridia; 94;Clostridiales; 94;Lachnospiraceae; 82;Catonella; 24
OTU_3346	1	1	1	4	0	0	0	0	-9.66786	-10.0338	0.0755505	0.870427	Bacteria;100;Firmicutes; 93;Clostridia; 93;Clostridiales; 92;Lachnospiraceae; 80;Lachnospiraceae Incertae Sedis; 51
OTU_135	6	1	3	0	0	0	0	0	-9.50855	-10.3357	0.0755828	0.870427	Bacteria;100;Firmicutes; 95;Clostridia; 95;Clostridiales; 94;Lachnospiraceae; 84;Lachnospiraceae Incertae Sedis; 50
OTU_150	10	400	856	1	2	7	8	0	-4.6534	-5.65456	0.0764121	0.870427	Bacteria;100;Bacteroidetes; 99;Bacteroidetes; 98;Bacteroidales; 98;Bacteroidaceae; 95;Bacteroides; 95
OTU_7	0	304	0	0	0	0	0	0	-6.66244	-14.913	0.0769622	0.870427	Bacteria;100;Firmicutes; 98;Clostridia; 98;Clostridiales; 98;Lachnospiraceae; 97;Coprococcus; 48
OTU_10392	8	0	0	15	0	0	0	0	-8.32049	-11.1685	0.0796929	0.870427	Bacteria;100;Firmicutes; 86;Clostridia; 86;Clostridiales; 86;Incertae Sedis XIII; 37;Anaerovorax; 35
OTU_758	3	2	0	3	0	0	0	0	-10.3	-10.0388	0.0799288	0.870427	Bacteria;100;Firmicutes; 64;Clostridia; 64;Clostridiales; 64;Ruminococcaceae; 44;Faecalibacterium; 42
OTU_1283	19	0	0	6	0	0	0	0	-8.59226	-11.3272	0.0803481	0.870427	Bacteria;100;Firmicutes; 81;Clostridia; 80;Clostridiales; 80;Ruminococcaceae; 62;Faecalibacterium; 47
OTU_1003	1	0	0	95	0	0	0	0	-6.89164	-12.8097	0.0808195	0.870427	Bacteria;100;Firmicutes; 92;Clostridia; 90;Clostridiales; 89;Lachnospiraceae; 74;Lachnospiraceae Incertae Sedis; 39
OTU_1485	0	18	0	4	0	0	0	0	-8.72009	-11.4372	0.0824602	0.870427	Bacteria;100;Firmicutes; 65;Clostridia; 64;Clostridiales; 64;Ruminococcaceae; 57;Faecalibacterium; 56
OTU_3128	0	0	11	9	0	0	0	0	-8.61804	-11.0342	0.0848921	0.870427	Bacteria;100;Actinobacteria; 38;Actinobacteria; 38;Actinomycetales; 38;Propionibacteriaceae; 21;Brooklawnia; 15
OTU_3402	13	0	28	8	0	0	0	1	-7.70175	-6.63207	0.0882571	0.870427	Bacteria;100;Firmicutes; 61;Clostridia; 60;Clostridiales; 60;Peptococcaceae; 51;Peptococcus; 51
OTU_278	18	19	0	4	0	2	0	0	-8.14475	-6.23722	0.0886842	0.870427	Bacteria;100;Bacteroidetes; 93;Bacteroidetes; 79;Bacteroidales; 79;Porphyromonadaceae; 61;Paludibacter; 28
OTU_568	3	0	0	25	0	0	0	0	-8.97924	-11.1372	0.0892197	0.870427	Bacteria;100;Firmicutes; 82;Clostridia; 82;Clostridiales; 80;Ruminococcaceae; 70;Faecalibacterium; 51
OTU_3861	4	2	1	0	0	0	0	0	-9.66786	-9.97969	0.0911093	0.870427	Bacteria;100;Firmicutes; 89;Clostridia; 89;Clostridiales; 89;Lachnospiraceae; 82;Pseudobutyrivibrio; 28
OTU_1287	38	0	0	80	1	0	0	0	-7.03201	-7.40083	0.0950505	0.870427	Bacteria;100;Firmicutes; 75;Clostridia; 75;Clostridiales; 75;Ruminococcaceae; 56;Faecalibacterium; 30
OTU_294	0	0	0	0	8	0	0	8	-9.13337	10.4897	0.0964628	0.870427	Bacteria;100;Firmicutes; 99;Clostridia; 99;Clostridiales; 99;Ruminococcaceae; 99;Faecalibacterium; 99
OTU_37	0	0	0	0	1	1	2	2	-9.82201	9.60682	0.0978466	0.870427	Bacteria;100;Firmicutes;100;Bacilli; 99;Lactobacillales; 99;Leuconostocaceae; 99;Leuconostoc; 99
OTU_2213	9	0	1	1	0	0	0	0	-9.50806	-10.3829	0.0982816	0.870427	Bacteria;100;Firmicutes; 56;Clostridia; 54;Clostridiales; 53;Incertae Sedis XI; 21;Soehngenia; 21
