# Supplementary material for: Alterations in the Colonic Microbiota in Response to Osmotic Diarrhea
Source: PLoS One. 2013 Feb 8;8(2):e55817. doi: 10.1371/journal.pone.0055817 (PMC3568139; doi:10.1371/journal.pone.0055817)
Supplement: Table S13 — Changing stool phylotypes identified by Viz. (XLSX) [file pone.0055817.s016.xlsx]

## Sheet: Tabelle1
OTU ID	AF2	BF2	CF2	DF2	AF3	BF3	CF3	DF3	Domain	DomainProb	Phylum	PhylumProb	Class	ClassProb	Order	OrderProb	Familiy	FamilyProb	Genus	GenusProb
OTU0	14	20	70	0	2	111	11	0	Bacteria;	1.0;	Firmicutes;	0.94;	Clostridia;	0.94;	Clostridiales;	0.94;	Ruminococcaceae;	0.9;	Acetanaerobacterium;	0.57;
OTU1	46	104	126	362	163	285	144	960	Bacteria;	1.0;	Firmicutes;	0.95;	Clostridia;	0.92;	Clostridiales;	0.92;	Lachnospiraceae;	0.85;	Lachnospira;	0.38;
OTU9	7	0	1	0	44	32	2	95	Bacteria;	1.0;	Firmicutes;	1.0;	Clostridia;	1.0;	Clostridiales;	1.0;	Ruminococcaceae;	1.0;	Faecalibacterium;	1.0;
OTU13	840	1542	0	917	4541	3811	1	4916	Bacteria;	1.0;	Bacteroidetes;	1.0;	Bacteroidetes;	0.99;	Bacteroidales;	0.99;	Bacteroidaceae;	0.99;	Bacteroides;	0.99;
OTU21	3	2	3	5	5	22	22	14	Bacteria;	1.0;	Firmicutes;	0.87;	Clostridia;	0.86;	Clostridiales;	0.86;	Lachnospiraceae;	0.86;	Roseburia;	0.78;
OTU31	9	0	7	1	6	48	7	6	Bacteria;	1.0;	Firmicutes;	0.98;	Clostridia;	0.97;	Clostridiales;	0.96;	Lachnospiraceae;	0.83;	Lachnospiraceae Incertae Sedis;	0.62;
OTU32	1	13	12	10	0	0	0	0	Bacteria;	1.0;	Firmicutes;	0.66;	Clostridia;	0.64;	Clostridiales;	0.64;	Ruminococcaceae;	0.48;	Faecalibacterium;	0.44;
OTU33	0	3270	671	1046	0	3393	4218	3365	Bacteria;	1.0;	Bacteroidetes;	1.0;	Bacteroidetes;	1.0;	Bacteroidales;	1.0;	Bacteroidaceae;	1.0;	Bacteroides;	1.0;
OTU40	139	0	0	398	0	0	0	20	Bacteria;	1.0;	Bacteroidetes;	0.92;	Bacteroidetes;	0.73;	Bacteroidales;	0.73;	Porphyromonadaceae;	0.58;	Paludibacter;	0.42;
OTU41	7	43	36	3	152	341	117	128	Bacteria;	1.0;	Firmicutes;	1.0;	Clostridia;	1.0;	Clostridiales;	1.0;	Ruminococcaceae;	1.0;	Faecalibacterium;	1.0;
OTU54	2	2	97	0	11	17	625	1	Bacteria;	1.0;	Firmicutes;	1.0;	Clostridia;	1.0;	Clostridiales;	1.0;	Peptostreptococcaceae;	0.99;	Peptostreptococcaceae Incertae Sedis;	0.92;
OTU66	6	15	4	14	90	164	32	158	Bacteria;	1.0;	Firmicutes;	0.98;	Clostridia;	0.98;	Clostridiales;	0.98;	Lachnospiraceae;	0.98;	Roseburia;	0.38;
OTU74	6	3	45	10	37	111	74	50	Bacteria;	1.0;	Firmicutes;	0.92;	Erysipelotrichi;	0.89;	Erysipelotrichales;	0.89;	Erysipelotrichaceae;	0.89;	Coprobacillus;	0.78;
OTU88	24	227	909	93	9	3	168	1	Bacteria;	1.0;	Firmicutes;	0.84;	Clostridia;	0.84;	Clostridiales;	0.84;	Lachnospiraceae;	0.77;	Catonella;	0.33;
OTU89	273	235	1236	830	4	0	0	46	Bacteria;	1.0;	Firmicutes;	0.98;	Clostridia;	0.98;	Clostridiales;	0.98;	Lachnospiraceae;	0.9;	Pseudobutyrivibrio;	0.36;
OTU92	4	2	405	0	0	0	0	0	Bacteria;	0.99;	Firmicutes;	0.54;	Clostridia;	0.49;	Clostridiales;	0.48;	Incertae Sedis XV;	0.24;	Aminobacterium;	0.22;
OTU95	4	14	26	18	0	0	0	0	Bacteria;	1.0;	Firmicutes;	0.99;	Clostridia;	0.99;	Clostridiales;	0.99;	Lachnospiraceae;	0.97;	Dorea;	0.54;
OTU108	2	3	8	0	16	40	12	27	Bacteria;	1.0;	Firmicutes;	0.97;	Clostridia;	0.97;	Clostridiales;	0.96;	Lachnospiraceae;	0.9;	Roseburia;	0.57;
OTU139	5	13	2	13	0	1	0	4	Bacteria;	1.0;	Firmicutes;	0.79;	Clostridia;	0.78;	Clostridiales;	0.77;	Ruminococcaceae;	0.53;	Faecalibacterium;	0.49;
OTU144	2	75	18	17	0	0	0	0	Bacteria;	1.0;	Firmicutes;	0.99;	Clostridia;	0.99;	Clostridiales;	0.99;	Lachnospiraceae;	0.99;	Lachnospira;	0.79;
OTU150	10	400	856	1	2	7	8	0	Bacteria;	1.0;	Bacteroidetes;	0.99;	Bacteroidetes;	0.98;	Bacteroidales;	0.98;	Bacteroidaceae;	0.95;	Bacteroides;	0.95;
OTU171	16	10	72	61	56	42	81	161	Bacteria;	1.0;	Firmicutes;	0.8;	Clostridia;	0.74;	Clostridiales;	0.71;	Lachnospiraceae;	0.6;	Parasporobacterium;	0.17;
OTU194	326	469	242	831	14	3	0	50	Bacteria;	1.0;	Bacteroidetes;	1.0;	Bacteroidetes;	1.0;	Bacteroidales;	1.0;	Rikenellaceae;	1.0;	Alistipes;	1.0;
OTU206	12	63	48	6	93	296	91	178	Bacteria;	1.0;	Firmicutes;	0.97;	Clostridia;	0.97;	Clostridiales;	0.97;	Ruminococcaceae;	0.97;	Faecalibacterium;	0.96;
OTU215	12	0	27	40	94	35	170	191	Bacteria;	1.0;	Firmicutes;	0.99;	Clostridia;	0.99;	Clostridiales;	0.99;	Lachnospiraceae;	0.94;	Lachnospiraceae Incertae Sedis;	0.35;
OTU222	69	116	41	58	1	14	0	6	Bacteria;	0.99;	Bacteroidetes;	0.95;	Bacteroidetes;	0.56;	Bacteroidales;	0.56;	Bacteroidaceae;	0.38;	Bacteroides;	0.38;
OTU246	8	6	13	13	0	1	0	0	Bacteria;	1.0;	Firmicutes;	0.56;	Clostridia;	0.52;	Clostridiales;	0.33;	Lachnospiraceae;	0.16;	Sporobacterium;	0.02;
OTU274	4	2	29	5	3	34	26	41	Bacteria;	1.0;	Firmicutes;	0.94;	Clostridia;	0.92;	Clostridiales;	0.86;	Lachnospiraceae;	0.8;	Lachnospiraceae Incertae Sedis;	0.31;
OTU338	28	1	5	12	0	0	0	0	Bacteria;	1.0;	Firmicutes;	0.98;	Clostridia;	0.98;	Clostridiales;	0.98;	Lachnospiraceae;	0.98;	Roseburia;	0.95;
OTU343	16	3	15	0	0	2	0	0	Bacteria;	1.0;	Firmicutes;	0.99;	Clostridia;	0.97;	Clostridiales;	0.97;	Ruminococcaceae;	0.94;	Ruminococcus;	0.93;
OTU411	3	0	0	246	2	0	0	202	Bacteria;	1.0;	Bacteroidetes;	1.0;	Bacteroidetes;	1.0;	Bacteroidales;	1.0;	Bacteroidaceae;	1.0;	Bacteroides;	1.0;
OTU421	2	178	3	413	284	2060	666	164	Bacteria;	1.0;	Firmicutes;	0.97;	Clostridia;	0.96;	Clostridiales;	0.96;	Lachnospiraceae;	0.94;	Pseudobutyrivibrio;	0.3;
OTU465	17	0	0	27	1	0	0	0	Bacteria;	1.0;	Firmicutes;	0.7;	Clostridia;	0.69;	Clostridiales;	0.69;	Ruminococcaceae;	0.49;	Faecalibacterium;	0.21;
OTU466	46	9	0	43	0	0	0	2	Bacteria;	1.0;	Firmicutes;	0.75;	Clostridia;	0.69;	Clostridiales;	0.66;	Ruminococcaceae;	0.47;	Ethanoligenens;	0.37;
OTU479	11	0	44	55	1	0	0	2	Bacteria;	1.0;	Bacteroidetes;	0.97;	Flavobacteria;	0.65;	Flavobacteriales;	0.65;	Cryomorphaceae;	0.27;	Fluviicola;	0.22;
OTU501	6	3	41	13	98	94	37	43	Bacteria;	0.98;	Firmicutes;	0.84;	Clostridia;	0.84;	Clostridiales;	0.84;	Lachnospiraceae;	0.76;	Syntrophococcus;	0.64;
OTU534	7	23	4	200	316	320	306	179	Bacteria;	1.0;	Firmicutes;	0.96;	Clostridia;	0.95;	Clostridiales;	0.95;	Lachnospiraceae;	0.93;	Lachnobacterium;	0.29;
OTU559	29	0	29	0	2	0	0	3	Bacteria;	1.0;	Firmicutes;	0.96;	Clostridia;	0.94;	Clostridiales;	0.94;	Lachnospiraceae;	0.94;	Parasporobacterium;	0.5;
OTU561	73	35	45	123	16	5	0	39	Bacteria;	1.0;	Bacteroidetes;	1.0;	Bacteroidetes;	1.0;	Bacteroidales;	1.0;	Rikenellaceae;	1.0;	Alistipes;	1.0;
OTU654	8	0	14	34	0	0	0	4	Bacteria;	1.0;	Bacteroidetes;	1.0;	Bacteroidetes;	1.0;	Bacteroidales;	1.0;	Rikenellaceae;	1.0;	Alistipes;	1.0;
OTU783	11	31	0	14	0	0	0	0	Bacteria;	1.0;	Firmicutes;	0.84;	Clostridia;	0.83;	Clostridiales;	0.83;	Ruminococcaceae;	0.52;	Sporobacter;	0.17;
OTU793	8	54	9	27	9	37	1	1	Bacteria;	1.0;	Firmicutes;	0.97;	Clostridia;	0.97;	Clostridiales;	0.97;	Lachnospiraceae;	0.97;	Dorea;	0.26;
OTU904	22	0	4	114	0	0	0	2	Bacteria;	1.0;	Firmicutes;	0.65;	Clostridia;	0.63;	Clostridiales;	0.63;	Lachnospiraceae;	0.54;	Shuttleworthia;	0.15;
OTU1005	7	44	30	80	0	0	0	2	Bacteria;	0.99;	Bacteroidetes;	0.97;	Bacteroidetes;	0.67;	Bacteroidales;	0.67;	Rikenellaceae;	0.67;	Alistipes;	0.67;
OTU1032	13	0	26	93	0	0	0	5	Bacteria;	0.99;	Firmicutes;	0.76;	Clostridia;	0.74;	Clostridiales;	0.74;	Ruminococcaceae;	0.6;	Faecalibacterium;	0.37;
OTU1057	53	24	0	90	27	2	0	13	Bacteria;	1.0;	Bacteroidetes;	0.98;	Bacteroidetes;	0.98;	Bacteroidales;	0.98;	Bacteroidaceae;	0.98;	Bacteroides;	0.98;
OTU1094	25	0	0	18	1	0	0	0	Bacteria;	1.0;	Proteobacteria;	0.23;	Gammaproteobacteria;	0.17;	Aeromonadales;	0.06;	Succinivibrionaceae;	0.06;	Succinivibrio;	0.06;
OTU1171	15	53	93	109	0	1	0	5	Bacteria;	1.0;	Proteobacteria;	0.52;	Alphaproteobacteria;	0.3;	Sphingomonadales;	0.14;	Sphingomonadaceae;	0.14;	Sphingosinicella;	0.12;
OTU1257	72	83	80	91	220	22	23	1	Bacteria;	1.0;	Firmicutes;	0.93;	Clostridia;	0.93;	Clostridiales;	0.93;	Ruminococcaceae;	0.91;	Subdoligranulum;	0.61;
OTU1287	38	0	0	80	1	0	0	0	Bacteria;	1.0;	Firmicutes;	0.75;	Clostridia;	0.75;	Clostridiales;	0.75;	Ruminococcaceae;	0.57;	Faecalibacterium;	0.3;
OTU1472	45	31	12	12	22	0	0	0	Bacteria;	1.0;	Firmicutes;	0.66;	Clostridia;	0.64;	Clostridiales;	0.64;	Ruminococcaceae;	0.42;	Faecalibacterium;	0.38;
OTU1580	215	267	420	155	600	102	72	5	Bacteria;	1.0;	Firmicutes;	0.95;	Clostridia;	0.95;	Clostridiales;	0.95;	Ruminococcaceae;	0.94;	Subdoligranulum;	0.55;
OTU1660	7	0	16	26	0	0	0	0	Bacteria;	0.99;	Bacteroidetes;	0.97;	Bacteroidetes;	0.49;	Bacteroidales;	0.49;	Bacteroidaceae;	0.31;	Bacteroides;	0.31;
OTU1861	33	0	110	152	3	0	0	21	Bacteria;	1.0;	Bacteroidetes;	1.0;	Bacteroidetes;	1.0;	Bacteroidales;	1.0;	Rikenellaceae;	1.0;	Alistipes;	1.0;
OTU1943	0	0	5	13	0	0	0	1	Bacteria;	0.88;	Bacteroidetes;	0.64;	Bacteroidetes;	0.45;	Bacteroidales;	0.45;	Bacteroidaceae;	0.12;	Anaerophaga;	0.12;
OTU1983	26	0	0	68	0	0	0	0	Bacteria;	1.0;	Firmicutes;	0.84;	Clostridia;	0.83;	Clostridiales;	0.83;	Ruminococcaceae;	0.72;	Faecalibacterium;	0.44;
OTU2034	22	0	0	37	0	0	0	0	Bacteria;	1.0;	Firmicutes;	0.68;	Clostridia;	0.66;	Clostridiales;	0.63;	Ruminococcaceae;	0.54;	Faecalibacterium;	0.38;
OTU2039	6	5	12	2	2	16	0	2	Bacteria;	1.0;	Firmicutes;	0.94;	Clostridia;	0.93;	Clostridiales;	0.93;	Lachnospiraceae;	0.93;	Parasporobacterium;	0.69;
OTU2142	16	0	26	0	0	0	0	0	Bacteria;	1.0;	Firmicutes;	1.0;	Clostridia;	1.0;	Clostridiales;	1.0;	Ruminococcaceae;	1.0;	Ruminococcus;	1.0;
OTU2361	48	0	9	27	0	0	0	0	Bacteria;	1.0;	Firmicutes;	0.74;	Clostridia;	0.74;	Clostridiales;	0.74;	Ruminococcaceae;	0.58;	Faecalibacterium;	0.41;
OTU3402	13	0	28	8	0	0	0	1	Bacteria;	1.0;	Firmicutes;	0.61;	Clostridia;	0.6;	Clostridiales;	0.6;	Peptococcaceae;	0.51;	Peptococcus;	0.51;
