# Supplementary material for: Alterations in the Colonic Microbiota in Response to Osmotic Diarrhea
Source: PLoS One. 2013 Feb 8;8(2):e55817. doi: 10.1371/journal.pone.0055817 (PMC3568139; doi:10.1371/journal.pone.0055817)
Supplement: Table S15 — Significantly changing mucosal phylotypes identified by edgeR. (XLS) [file pone.0055817.s018.xls]

## Sheet: Differential OTUs
Ref_OTU	BM2	CM2	DM2	BM3	CM3	DM3	logConc	logFC	PValue	FDR	Classification
OTU_13	613	0	4954	160	15	0	-3.11398	-2.67624	6.96204e-05	0.113342	Bacteria;100;Bacteroidetes;100;Bacteroidetes; 99;Bacteroidales; 99;Bacteroidaceae; 99;Bacteroides; 99
OTU_177	94	0	1372	0	0	0	-3.84829	-18.0294	0.000884035	0.571645	Bacteria;100;Bacteroidetes;100;Bacteroidetes;100;Bacteroidales;100;Porphyromonadaceae;100;Parabacteroides;100
OTU_97	43	0	1262	0	0	0	-5.11509	-17.8675	0.00126075	0.571645	Bacteria;100;Bacteroidetes; 98;Bacteroidetes; 94;Bacteroidales; 94;Bacteroidaceae; 84;Bacteroides; 84
OTU_194	144	31	5	0	0	0	-5.94563	-14.5092	0.00147966	0.571645	Bacteria;100;Bacteroidetes;100;Bacteroidetes;100;Bacteroidales;100;Rikenellaceae;100;Alistipes;100
OTU_89	54	136	2	0	0	0	-7.03155	-14.1992	0.00175567	0.571645	Bacteria;100;Firmicutes; 98;Clostridia; 98;Clostridiales; 98;Lachnospiraceae; 90;Pseudobutyrivibrio; 36
OTU_150	181	125	0	0	0	0	-6.45785	-14.9198	0.003068	0.598027	Bacteria;100;Bacteroidetes; 99;Bacteroidetes; 98;Bacteroidales; 98;Bacteroidaceae; 95;Bacteroides; 95
OTU_145	950	28	1	3	0	0	-5.29185	-9.32425	0.00509878	0.598027	Bacteria;100;Bacteroidetes; 97;Bacteroidetes; 97;Bacteroidales; 97;Bacteroidaceae; 97;Bacteroides; 97
OTU_243	52	0	28	0	0	0	-6.75656	-13.7382	0.00565191	0.598027	Bacteria;100;Firmicutes; 70;Clostridia; 68;Clostridiales; 67;Ruminococcaceae; 28;Faecalibacterium; 23
OTU_85	0	43	58	0	0	0	-7.67392	-13.933	0.00586636	0.598027	Bacteria;100;Bacteroidetes; 97;Bacteroidetes; 97;Bacteroidales; 97;Bacteroidaceae; 95;Bacteroides; 95
OTU_666	28	0	43	0	0	0	-7.78145	-13.6771	0.00611524	0.598027	Bacteria;100;Firmicutes; 97;Clostridia; 96;Clostridiales; 96;Lachnospiraceae; 94;Dorea; 35
OTU_561	27	1	11	0	0	0	-8.38057	-12.8082	0.00734328	0.598027	Bacteria;100;Bacteroidetes;100;Bacteroidetes;100;Bacteroidales;100;Rikenellaceae;100;Alistipes;100
OTU_911	12	5	6	0	0	0	-9.15355	-12.0508	0.00789067	0.598027	Bacteria;100;Bacteroidetes;100;Bacteroidetes;100;Bacteroidales;100;Bacteroidaceae;100;Bacteroides;100
OTU_27	1203	88	84	30	2	0	-3.88937	-6.9052	0.00813697	0.598027	Bacteria;100;Bacteroidetes;100;Bacteroidetes;100;Bacteroidales;100;Bacteroidaceae;100;Bacteroides;100
OTU_1057	34	0	17	0	0	0	-7.83772	-13.0931	0.00834902	0.598027	Bacteria;100;Bacteroidetes; 98;Bacteroidetes; 98;Bacteroidales; 98;Bacteroidaceae; 98;Bacteroides; 98
OTU_154	8	1	26	0	0	0	-8.62609	-13.0998	0.00846103	0.598027	Bacteria;100;Firmicutes;100;Clostridia;100;Clostridiales; 99;Lachnospiraceae; 97;Lachnospiraceae Incertae Sedis; 59
OTU_25	13	12	2	0	0	0	-7.84275	-11.8619	0.00857156	0.598027	Bacteria;100;Firmicutes; 98;Clostridia; 98;Clostridiales; 98;Lachnospiraceae; 96;Dorea; 26
OTU_291	21	2	5	0	0	0	-7.80638	-12.2188	0.00930173	0.598027	Bacteria;100;Firmicutes;100;Clostridia;100;Clostridiales;100;Ruminococcaceae;100;Faecalibacterium;100
OTU_1257	83	19	0	0	0	0	-7.14457	-13.471	0.00931397	0.598027	Bacteria;100;Firmicutes; 93;Clostridia; 93;Clostridiales; 93;Ruminococcaceae; 91;Subdoligranulum; 61
OTU_1005	38	0	9	0	0	0	-7.9194	-12.8024	0.0104265	0.598027	Bacteria; 99;Bacteroidetes; 97;Bacteroidetes; 67;Bacteroidales; 67;Rikenellaceae; 67;Alistipes; 67
OTU_1341	0	0	0	9	13	24	-8.3528	11.3728	0.0115675	0.598027	Bacteria;100;Proteobacteria;100;Gammaproteobacteria;100;Pseudomonadales; 99;Pseudomonadaceae; 99;Pseudomonas; 67
OTU_139	18	2	3	0	0	0	-9.04594	-11.8717	0.0123137	0.598027	Bacteria;100;Firmicutes; 79;Clostridia; 78;Clostridiales; 77;Ruminococcaceae; 53;Faecalibacterium; 49
OTU_875	0	2	143	0	0	0	-7.31231	-14.8303	0.013173	0.598027	Bacteria;100;Firmicutes;100;Clostridia;100;Clostridiales;100;Ruminococcaceae;100;Faecalibacterium;100
OTU_182	3	0	56	0	0	0	-7.06105	-13.6101	0.0137034	0.598027	Bacteria; 99;Proteobacteria; 73;Alphaproteobacteria; 41;Sphingomonadales; 36;Sphingomonadaceae; 36;Erythromicrobium; 36
OTU_83	168	0	1	0	0	0	-7.15915	-14.2518	0.0138052	0.598027	Bacteria;100;Bacteroidetes;100;Bacteroidetes;100;Bacteroidales;100;Porphyromonadaceae;100;Parabacteroides;100
OTU_1171	50	11	0	0	0	0	-7.65867	-12.7498	0.0144674	0.598027	Bacteria;100;Proteobacteria; 52;Alphaproteobacteria; 30;Sphingomonadales; 14;Sphingomonadaceae; 14;Sphingosinicella; 12
OTU_34	1	0	123	0	0	0	-7.44774	-14.6485	0.0146005	0.598027	Bacteria;100;Bacteroidetes; 90;Bacteroidetes; 86;Bacteroidales; 86;Bacteroidaceae; 83;Bacteroides; 80
OTU_766	3	0	47	0	0	0	-8.37702	-13.4842	0.014806	0.598027	Bacteria;100;Firmicutes;100;Clostridia;100;Clostridiales;100;Lachnospiraceae;100;Roseburia; 93
OTU_844	140	0	1	0	0	0	-7.34028	-14.0211	0.014926	0.598027	Bacteria;100;Bacteroidetes;100;Bacteroidetes;100;Bacteroidales;100;Bacteroidaceae; 99;Bacteroides; 99
OTU_901	7	1	6	0	0	0	-9.64999	-11.6744	0.0167252	0.598027	Bacteria;100;Proteobacteria; 95;Betaproteobacteria; 86;Burkholderiales; 65;Oxalobacteraceae; 40;Naxibacter; 34
OTU_174	0	0	291	0	0	0	-5.46526	-16.1953	0.017897	0.598027	Bacteria;100;Bacteroidetes;100;Bacteroidetes;100;Bacteroidales;100;Porphyromonadaceae;100;Parabacteroides;100
OTU_2498	132	2	0	0	0	0	-6.24075	-13.9965	0.0180443	0.598027	Bacteria; 99;Bacteroidetes; 93;Bacteroidetes; 82;Bacteroidales; 82;Bacteroidaceae; 75;Bacteroides; 75
OTU_211	0	0	263	0	0	0	-5.56643	-15.5756	0.0188146	0.598027	Bacteria;100;Bacteroidetes;100;Bacteroidetes;100;Bacteroidales;100;Bacteroidaceae;100;Bacteroides;100
OTU_793	65	4	0	0	0	0	-8.05494	-12.9079	0.019213	0.598027	Bacteria;100;Firmicutes; 97;Clostridia; 97;Clostridiales; 97;Lachnospiraceae; 97;Dorea; 26
OTU_327	0	0	239	0	0	0	-6.79156	-15.4665	0.0196186	0.598027	Bacteria;100;Proteobacteria; 98;Betaproteobacteria; 92;Burkholderiales; 70;Alcaligenaceae; 27;Sutterella; 22
OTU_902	4	5	2	0	0	0	-9.89115	-10.8668	0.0197064	0.598027	Bacteria;100;Proteobacteria;100;Betaproteobacteria;100;Burkholderiales;100;Incertae sedis 5; 87;Pelomonas; 82
OTU_151	0	0	234	0	0	0	-6.72612	-15.4102	0.0197915	0.598027	Bacteria;100;Bacteroidetes; 94;Bacteroidetes; 94;Bacteroidales; 94;Bacteroidaceae; 82;Bacteroides; 82
OTU_1867	0	0	213	0	0	0	-5.77729	-15.2717	0.0207426	0.598027	Bacteria;100;Firmicutes; 84;Clostridia; 84;Clostridiales; 84;Ruminococcaceae; 74;Faecalibacterium; 54
OTU_987	4	1	6	0	0	0	-9.89115	-11.3467	0.0210556	0.598027	Bacteria;100;Firmicutes;100;Clostridia;100;Clostridiales;100;Ruminococcaceae;100;Faecalibacterium;100
OTU_94	770	0	412	33	0	0	-5.18655	-8.51753	0.0215137	0.598027	Bacteria;100;Bacteroidetes; 99;Bacteroidetes; 99;Bacteroidales; 99;Bacteroidaceae; 99;Bacteroides; 99
OTU_201	0	0	176	0	0	0	-5.9681	-15.0137	0.0224339	0.598027	Bacteria;100;Bacteroidetes;100;Bacteroidetes;100;Bacteroidales;100;Porphyromonadaceae;100;Parabacteroides;100
OTU_4359	2	0	24	0	0	0	-9.00992	-12.4519	0.0231588	0.598027	Bacteria;100;Bacteroidetes;100;Bacteroidetes;100;Bacteroidales;100;Bacteroidaceae;100;Bacteroides;100
OTU_107	0	0	138	0	0	0	-6.84229	-14.7497	0.0249158	0.598027	Bacteria;100;Firmicutes;100;Clostridia;100;Clostridiales;100;Ruminococcaceae;100;Faecalibacterium;100
OTU_169	4	0	7	0	0	0	-8.74069	-11.0948	0.0301412	0.598027	Bacteria;100;Bacteroidetes; 99;Bacteroidetes; 97;Bacteroidales; 97;Bacteroidaceae; 95;Bacteroides; 94
OTU_423	0	0	89	0	0	0	-7.77938	-13.987	0.0302559	0.598027	Bacteria; 99;Firmicutes; 87;Clostridia; 82;Clostridiales; 82;Veillonellaceae; 74;Succinispira; 46
OTU_368	1	0	22	0	0	0	-9.13252	-12.4097	0.0309135	0.598027	Bacteria;100;Bacteroidetes;100;Bacteroidetes;100;Bacteroidales;100;Porphyromonadaceae; 97;Parabacteroides; 96
OTU_411	0	0	73	0	0	0	-7.97756	-13.7407	0.0330131	0.598027	Bacteria;100;Bacteroidetes;100;Bacteroidetes;100;Bacteroidales;100;Bacteroidaceae;100;Bacteroides;100
OTU_376	137	0	0	0	0	0	-7.34804	-13.6716	0.0333522	0.598027	Bacteria; 99;Proteobacteria; 81;Alphaproteobacteria; 48;Rhizobiales; 20;Methylocystaceae; 20;Terasakiella; 18
OTU_90	0	0	68	0	0	0	-8.06954	-13.6311	0.0340692	0.598027	Bacteria;100;Bacteroidetes; 90;Bacteroidetes; 89;Bacteroidales; 89;Bacteroidaceae; 83;Bacteroides; 83
OTU_809	119	0	0	0	0	0	-7.50992	-13.6804	0.0355069	0.598027	Bacteria;100;Firmicutes; 84;Clostridia; 67;Clostridiales; 67;Ruminococcaceae; 50;Anaerotruncus; 35
OTU_9381	1	0	16	0	0	0	-9.45583	-11.9406	0.0355649	0.598027	Bacteria; 99;Bacteroidetes; 99;Bacteroidetes; 97;Bacteroidales; 97;Bacteroidaceae; 95;Bacteroides; 95
OTU_2416	2	0	9	0	0	0	-8.74069	-11.3179	0.0356125	0.598027	Bacteria;100;Bacteroidetes; 98;Bacteroidetes; 98;Bacteroidales; 98;Bacteroidaceae; 98;Bacteroides; 98
OTU_3606	18	0	1	0	0	0	-9.32358	-11.2848	0.0364729	0.598027	Bacteria;100;Bacteroidetes; 89;Flavobacteria; 30;Flavobacteriales; 30;Cryomorphaceae; 18;Brumimicrobium; 13
OTU_1530	108	0	0	0	0	0	-7.49931	-13.4545	0.0370566	0.598027	Bacteria;100;Firmicutes;100;Clostridia;100;Clostridiales;100;Ruminococcaceae; 99;Subdoligranulum; 85
OTU_1342	17	0	1	0	0	0	-9.29107	-11.3089	0.0373542	0.598027	Bacteria;100;Firmicutes;100;Clostridia;100;Clostridiales; 99;Lachnospiraceae; 99;Coprococcus; 67
OTU_343	6	10	0	0	0	0	-9.49543	-10.5517	0.0374372	0.598027	Bacteria;100;Firmicutes; 99;Clostridia; 97;Clostridiales; 97;Ruminococcaceae; 94;Ruminococcus; 93
OTU_1600	101	0	0	0	0	0	-7.56632	-13.392	0.0381528	0.598027	Bacteria; 97;Bacteroidetes; 91;Bacteroidetes; 73;Bacteroidales; 73;Porphyromonadaceae; 62;Paludibacter; 42
OTU_2167	5	0	3	0	0	0	-9.05914	-10.4988	0.0397891	0.598027	Bacteria;100;Firmicutes; 94;Clostridia; 94;Clostridiales; 94;Lachnospiraceae; 94;Lachnospira; 28
OTU_42	238	25	14	0	14	0	-6.5947	-7.92605	0.0398537	0.598027	Bacteria;100;Firmicutes;100;Clostridia;100;Clostridiales;100;Ruminococcaceae;100;Faecalibacterium;100
OTU_1558	2	0	7	0	0	0	-9.98421	-10.9183	0.0398736	0.598027	Bacteria;100;Bacteroidetes; 97;Bacteroidetes; 95;Bacteroidales; 95;Bacteroidaceae; 94;Bacteroides; 94
OTU_6137	1	0	12	0	0	0	-9.47919	-11.6313	0.0404178	0.598027	Bacteria;100;Bacteroidetes;100;Bacteroidetes;100;Bacteroidales;100;Porphyromonadaceae;100;Parabacteroides;100
OTU_1943	0	4	6	0	0	0	-8.836	-10.7137	0.0412556	0.598027	Bacteria; 88;Bacteroidetes; 64;Bacteroidetes; 45;Bacteroidales; 45;Bacteroidaceae; 12;Anaerophaga; 12
OTU_6041	3	2	1	0	0	0	-10.2524	-10.0773	0.0412639	0.598027	Bacteria;100;Proteobacteria; 98;Betaproteobacteria; 97;Burkholderiales; 90;Incertae sedis 5; 48;Leptothrix; 26
OTU_7	79	0	0	0	0	0	-7.67469	-13.0799	0.042564	0.598027	Bacteria;100;Firmicutes; 98;Clostridia; 98;Clostridiales; 98;Lachnospiraceae; 97;Coprococcus; 48
OTU_4522	77	0	0	0	0	0	-7.92421	-12.971	0.0430752	0.598027	Bacteria; 91;Bacteroidetes; 61;Bacteroidetes; 40;Bacteroidales; 40;Rikenellaceae; 16;Marinilabilia; 15
OTU_246	13	3	0	0	0	0	-8.366	-10.942	0.043192	0.598027	Bacteria;100;Firmicutes; 56;Clostridia; 52;Clostridiales; 33;Lachnospiraceae; 16;Sporobacterium; 2
OTU_1327	75	0	0	0	0	0	-7.86395	-12.9388	0.0435885	0.598027	Bacteria; 98;Proteobacteria; 84;Alphaproteobacteria; 80;Rhizobiales; 33;Bradyrhizobiaceae; 17;Agromonas; 13
OTU_2708	6	0	2	0	0	0	-9.05914	-10.4849	0.0439221	0.598027	Bacteria;100;Firmicutes;100;Bacilli;100;Lactobacillales;100;Streptococcaceae;100;Streptococcus;100
OTU_57	71	0	0	0	0	0	-7.78145	-12.8719	0.0446756	0.598027	Bacteria;100;Bacteroidetes;100;Bacteroidetes; 99;Bacteroidales; 99;Bacteroidaceae; 92;Bacteroides; 92
OTU_2062	4	1	1	0	0	0	-9.34683	-10.2594	0.0452795	0.598027	Bacteria;100;Bacteroidetes; 97;Bacteroidetes; 94;Bacteroidales; 94;Bacteroidaceae; 93;Bacteroides; 93
OTU_1230	66	0	0	0	0	0	-7.57989	-12.7741	0.0461748	0.598027	Bacteria;100;Bacteroidetes;100;Bacteroidetes;100;Bacteroidales;100;Porphyromonadaceae;100;Parabacteroides;100
OTU_596	0	0	0	8	9	0	-9.21092	10.2314	0.046407	0.598027	Bacteria;100;Proteobacteria;100;Epsilonproteobacteria;100;Campylobacterales;100;Campylobacteraceae;100;Arcobacter;100
OTU_1615	5	0	2	0	0	0	-10.2355	-10.2485	0.0474669	0.598027	Bacteria; 99;Firmicutes; 62;Clostridia; 62;Clostridiales; 62;Ruminococcaceae; 34;Ruminococcaceae Incertae Sedis; 28
OTU_1472	23	1	0	0	0	0	-9.00338	-11.492	0.0479267	0.598027	Bacteria;100;Firmicutes; 66;Clostridia; 64;Clostridiales; 64;Ruminococcaceae; 42;Faecalibacterium; 38
OTU_222	60	0	0	0	0	0	-7.04424	-12.5722	0.0481514	0.598027	Bacteria; 99;Bacteroidetes; 95;Bacteroidetes; 56;Bacteroidales; 56;Bacteroidaceae; 38;Bacteroides; 38
OTU_2836	59	0	0	0	0	0	-7.06105	-12.5349	0.0485377	0.598027	Bacteria;100;Firmicutes;100;Clostridia;100;Clostridiales;100;Ruminococcaceae;100;Subdoligranulum; 80
OTU_2156	4	7	6	0	1	0	-8.24821	-5.44837	0.050573	0.598027	Bacteria;100;Bacteroidetes; 99;Bacteroidetes; 98;Bacteroidales; 98;Bacteroidaceae; 97;Bacteroides; 97
OTU_264	8	0	1	0	0	0	-8.94136	-10.4417	0.0519765	0.598027	Bacteria;100;Bacteroidetes;100;Bacteroidetes; 85;Bacteroidales; 85;Rikenellaceae; 85;Alistipes; 85
OTU_1320	0	0	26	0	0	0	-8.92334	-12.325	0.0524207	0.598027	Bacteria;100;Bacteroidetes; 97;Bacteroidetes; 96;Bacteroidales; 96;Bacteroidaceae; 96;Bacteroides; 96
OTU_317	0	0	26	0	0	0	-9.00992	-12.325	0.0524207	0.598027	Bacteria;100;Bacteroidetes; 98;Bacteroidetes; 96;Bacteroidales; 96;Bacteroidaceae; 95;Bacteroides; 95
OTU_1391	1	3	1	0	0	0	-10.572	-9.76966	0.0544054	0.598027	Bacteria;100;Firmicutes; 99;Bacilli; 99;Lactobacillales; 99;Leuconostocaceae; 93;Weissella; 93
OTU_2483	6	0	1	0	0	0	-9.19267	-10.0951	0.0590143	0.598027	Bacteria;100;Firmicutes; 89;Clostridia; 76;Clostridiales; 75;Ruminococcaceae; 48;Sporobacter; 30
OTU_65	6	0	1	0	0	0	-10.0982	-10.0951	0.0590143	0.598027	Bacteria;100;Bacteroidetes;100;Bacteroidetes;100;Bacteroidales;100;Rikenellaceae;100;Alistipes;100
OTU_5133	2	1	1	0	0	0	-10.6578	-9.81737	0.0602407	0.598027	Bacteria;100;Firmicutes; 95;Bacilli; 95;Lactobacillales; 94;Leuconostocaceae; 88;Weissella; 86
OTU_4283	0	0	0	4	9	0	-9.70307	9.91074	0.0606706	0.598027	Bacteria;100;Proteobacteria; 99;Betaproteobacteria; 98;Methylophilales; 51;Methylophilaceae; 51;Methylophilus; 19
OTU_302	0	0	18	0	0	0	-9.37765	-11.7838	0.0620749	0.598027	Bacteria;100;Firmicutes; 84;Clostridia; 82;Clostridiales; 77;Ruminococcaceae; 73;Acetanaerobacterium; 12
OTU_802	0	0	18	0	0	0	-9.39867	-11.7838	0.0620749	0.598027	Bacteria;100;Bacteroidetes; 97;Bacteroidetes; 96;Bacteroidales; 96;Bacteroidaceae; 92;Bacteroides; 92
OTU_6426	3	6	0	0	0	0	-9.84691	-9.82744	0.0621047	0.598027	Bacteria;100;Proteobacteria;100;Alphaproteobacteria;100;Caulobacterales; 99;Caulobacteraceae; 99;Caulobacter; 98
OTU_3073	0	0	17	0	0	0	-9.43481	-11.6756	0.0637389	0.598027	Bacteria;100;Bacteroidetes; 97;Bacteroidetes; 94;Bacteroidales; 94;Bacteroidaceae; 91;Bacteroides; 91
OTU_312	31	0	0	0	0	0	-8.83403	-11.9742	0.0644567	0.598027	Bacteria;100;Firmicutes;100;Clostridia;100;Clostridiales;100;Lachnospiraceae;100;Coprococcus; 64
OTU_0	32	5	0	1	0	0	-8.13196	-6.11969	0.0648705	0.598027	Bacteria;100;Firmicutes; 94;Clostridia; 94;Clostridiales; 94;Ruminococcaceae; 90;Acetanaerobacterium; 56
OTU_2662	0	0	16	0	0	0	-8.366	-11.5847	0.0655113	0.598027	Bacteria; 98;Firmicutes; 72;Clostridia; 69;Clostridiales; 69;Ruminococcaceae; 33;Faecalibacterium; 28
OTU_337	0	0	16	0	0	0	-9.49543	-11.5847	0.0655113	0.598027	Bacteria;100;Bacteroidetes;100;Bacteroidetes;100;Bacteroidales;100;Bacteroidaceae;100;Bacteroides;100
OTU_50	0	0	16	0	0	0	-9.27155	-11.5847	0.0655113	0.598027	Bacteria;100;Firmicutes; 84;Clostridia; 80;Clostridiales; 78;Lachnospiraceae; 66;Parasporobacterium; 25
OTU_1401	28	0	0	0	0	0	-8.84923	-11.596	0.0679872	0.598027	Bacteria;100;Firmicutes; 86;Clostridia; 81;Clostridiales; 80;Ruminococcaceae; 69;Ruminococcus; 68
OTU_4461	0	0	0	9	0	11	-9.27229	9.54155	0.0686022	0.598027	Bacteria;100;Proteobacteria;100;Gammaproteobacteria;100;Xanthomonadales;100;Xanthomonadaceae;100;Stenotrophomonas;100
OTU_371	146	0	3	9	0	0	-7.20542	-5.58616	0.0688176	0.598027	Bacteria;100;Bacteroidetes; 98;Bacteroidetes; 98;Bacteroidales; 98;Bacteroidaceae; 84;Bacteroides; 84
OTU_673	2	0	2	0	0	0	-10.6578	-9.77804	0.0696213	0.598027	Bacteria;100;Firmicutes; 99;Clostridia; 99;Clostridiales; 99;Ruminococcaceae; 99;Faecalibacterium; 99
OTU_2563	0	0	14	0	0	0	-8.49953	-11.4073	0.0696831	0.598027	Bacteria; 99;Proteobacteria; 57;Deltaproteobacteria; 53;Desulfovibrionales; 41;Desulfovibrionaceae; 36;Bilophila; 13
OTU_649	0	0	14	0	0	0	-9.40508	-11.4073	0.0696831	0.598027	Bacteria;100;Firmicutes; 71;Clostridia; 69;Clostridiales; 68;Lachnospiraceae; 55;Lachnobacterium; 35
OTU_2042	0	49	0	0	0	0	-7.24676	-11.4619	0.0703261	0.598027	Bacteria;100;Bacteroidetes; 92;Bacteroidetes; 71;Bacteroidales; 71;Porphyromonadaceae; 61;Paludibacter; 24
OTU_749	6	2	0	0	0	0	-10.2096	-10.0287	0.0703752	0.598027	Bacteria;100;Firmicutes; 90;Clostridia; 89;Clostridiales; 89;Ruminococcaceae; 85;Faecalibacterium; 53
OTU_5488	4	0	1	0	0	0	-10.4347	-9.85266	0.0703847	0.598027	Bacteria;100;Firmicutes;100;Clostridia;100;Clostridiales;100;Ruminococcaceae; 98;Faecalibacterium; 95
OTU_638	0	0	0	2	1	11	-9.40508	9.30927	0.0712639	0.598027	Bacteria;100;Proteobacteria;100;Gammaproteobacteria;100;Pseudomonadales; 89;Moraxellaceae; 78;Acinetobacter; 76
OTU_3351	0	0	13	0	0	0	-9.70307	-11.4203	0.0720489	0.598027	Bacteria;100;Firmicutes; 84;Clostridia; 84;Clostridiales; 84;Ruminococcaceae; 59;Ruminococcaceae Incertae Sedis; 47
OTU_187	0	2	3	0	0	0	-9.52915	-10.0033	0.072472	0.598027	Bacteria;100;Firmicutes; 75;Bacilli; 66;Lactobacillales; 56;Aerococcaceae; 17;Dolosicoccus; 1
OTU_2039	24	0	0	0	0	0	-7.96053	-11.2913	0.0730643	0.598027	Bacteria;100;Firmicutes; 94;Clostridia; 93;Clostridiales; 93;Lachnospiraceae; 93;Parasporobacterium; 69
OTU_11075	0	0	0	0	7	6	-9.20459	9.55977	0.0734317	0.598027	Bacteria;100;Proteobacteria;100;Alphaproteobacteria;100;Rhizobiales;100;Brucellaceae; 74;Ochrobactrum; 74
OTU_1580	192	41	0	0	4	0	-6.71338	-6.50995	0.0734708	0.598027	Bacteria;100;Firmicutes; 95;Clostridia; 95;Clostridiales; 95;Ruminococcaceae; 94;Subdoligranulum; 55
OTU_95	23	0	0	0	0	0	-9.15355	-11.2341	0.0744951	0.598027	Bacteria;100;Firmicutes; 99;Clostridia; 99;Clostridiales; 99;Lachnospiraceae; 97;Dorea; 54
OTU_92	0	43	0	0	0	0	-8.52784	-11.3566	0.0746219	0.598027	Bacteria; 99;Firmicutes; 54;Clostridia; 49;Clostridiales; 48;Incertae Sedis XV; 24;Aminobacterium; 22
OTU_1572	0	0	12	0	0	0	-9.69653	-11.3209	0.0747943	0.598027	Bacteria;100;Firmicutes; 57;Clostridia; 55;Clostridiales; 54;Lachnospiraceae; 30;Shuttleworthia; 3
OTU_910	1	0	3	0	0	0	-10.9028	-9.97025	0.0754925	0.598027	Bacteria;100;Bacteroidetes; 92;Bacteroidetes; 86;Bacteroidales; 86;Bacteroidaceae; 84;Bacteroides; 84
OTU_3188	0	6	1	0	0	0	-10.3221	-9.52095	0.0768495	0.598027	Bacteria;100;Firmicutes; 99;Bacilli; 99;Lactobacillales; 99;Leuconostocaceae; 95;Leuconostoc; 95
OTU_4793	0	6	1	0	0	0	-10.0982	-9.52095	0.0768495	0.598027	Bacteria;100;Bacteroidetes;100;Flavobacteria;100;Flavobacteriales;100;Flavobacteriaceae;100;Chryseobacterium; 90
OTU_1110	0	40	0	0	0	0	-8.08066	-11.222	0.0771872	0.598027	Bacteria;100;Bacteroidetes; 99;Bacteroidetes; 97;Bacteroidales; 97;Bacteroidaceae; 96;Bacteroides; 96
OTU_1829	21	0	0	0	0	0	-8.09406	-11.1222	0.0776525	0.598027	Bacteria;100;Firmicutes;100;Clostridia;100;Clostridiales;100;Lachnospiraceae;100;Coprococcus; 91
OTU_4902	0	0	11	0	0	0	-9.64624	-11.2593	0.0779506	0.598027	Bacteria; 98;Firmicutes; 91;Clostridia; 74;Clostridiales; 72;Clostridiaceae; 34;Caminicella; 16
OTU_67	0	0	11	0	0	0	-9.64624	-11.2593	0.0779506	0.598027	Bacteria;100;Firmicutes; 96;Clostridia; 95;Clostridiales; 95;Lachnospiraceae; 87;Roseburia; 47
OTU_3336	20	0	0	0	0	0	-9.27229	-11.1583	0.0795411	0.598027	Bacteria;100;Bacteroidetes; 89;Bacteroidetes; 76;Bacteroidales; 76;Porphyromonadaceae; 66;Paludibacter; 18
OTU_1006	3	0	1	0	0	0	-10.3832	-9.63701	0.079593	0.598027	Bacteria;100;Bacteroidetes; 98;Bacteroidetes; 98;Bacteroidales; 98;Bacteroidaceae; 97;Bacteroides; 96
OTU_3140	3	0	1	0	0	0	-10.8817	-9.63701	0.079593	0.598027	Bacteria;100;Bacteroidetes; 99;Bacteroidetes; 99;Bacteroidales; 99;Bacteroidaceae; 99;Bacteroides; 99
OTU_3263	0	0	10	0	0	0	-9.96543	-11.074	0.0813005	0.598027	Bacteria;100;Firmicutes;100;Erysipelotrichi;100;Erysipelotrichales;100;Erysipelotrichaceae;100;Holdemania;100
OTU_589	0	0	10	0	0	0	-9.74155	-11.074	0.0813005	0.598027	Bacteria;100;Firmicutes; 99;Clostridia; 97;Clostridiales; 96;Lachnospiraceae; 95;Lachnospira; 33
OTU_1316	19	0	0	0	0	0	-9.237	-10.9702	0.0814162	0.598027	Bacteria;100;Firmicutes; 77;Clostridia; 75;Clostridiales; 75;Lachnospiraceae; 71;Lachnospiraceae Incertae Sedis; 63
OTU_88	42	42	0	0	4	0	-7.81171	-5.61987	0.0854457	0.598027	Bacteria;100;Firmicutes; 84;Clostridia; 84;Clostridiales; 84;Lachnospiraceae; 77;Catonella; 33
OTU_434	17	0	0	0	0	0	-9.43481	-10.8724	0.0856332	0.598027	Bacteria;100;Firmicutes; 48;Clostridia; 47;Clostridiales; 47;Ruminococcaceae; 34;Faecalibacterium; 27
OTU_783	17	0	0	0	0	0	-9.45583	-10.8724	0.0856332	0.598027	Bacteria;100;Firmicutes; 84;Clostridia; 83;Clostridiales; 83;Ruminococcaceae; 52;Sporobacter; 17
OTU_1765	2	4	0	0	0	0	-9.34683	-9.35633	0.0865862	0.598027	Bacteria;100;Firmicutes; 69;Clostridia; 69;Clostridiales; 69;Veillonellaceae; 53;Veillonella; 52
OTU_2524	0	31	0	0	0	0	-7.7046	-10.8699	0.0867425	0.598027	Bacteria;100;Bacteroidetes; 95;Bacteroidetes; 75;Bacteroidales; 75;Porphyromonadaceae; 52;Paludibacter; 35
OTU_763	0	31	0	0	0	0	-8.85506	-10.8699	0.0867425	0.598027	Bacteria;100;Bacteroidetes;100;Bacteroidetes;100;Bacteroidales;100;Bacteroidaceae;100;Bacteroides;100
OTU_4105	16	0	0	0	0	0	-9.49543	-10.8136	0.0880001	0.598027	Bacteria;100;Firmicutes;100;Clostridia;100;Clostridiales;100;Lachnospiraceae;100;Lachnospira; 86
OTU_7754	16	0	0	0	0	0	-9.51646	-10.8136	0.0880001	0.598027	Bacteria;100;Firmicutes; 74;Clostridia; 68;Clostridiales; 63;Incertae Sedis XII; 15;Acidaminobacter; 15
OTU_1128	0	30	0	0	0	0	-8.36835	-10.8022	0.0880423	0.598027	Bacteria;100;Firmicutes; 92;Clostridia; 91;Clostridiales; 89;Ruminococcaceae; 88;Faecalibacterium; 31
OTU_332	0	30	0	0	0	0	-8.86682	-10.8022	0.0880423	0.598027	Bacteria;100;Bacteroidetes; 94;Bacteroidetes; 89;Bacteroidales; 89;Bacteroidaceae; 87;Bacteroides; 87
OTU_891	0	30	0	0	0	0	-8.88785	-10.8022	0.0880423	0.598027	Bacteria;100;Firmicutes; 99;Clostridia; 99;Clostridiales; 99;Veillonellaceae; 98;Dialister; 97
OTU_66	26	0	106	0	3	0	-7.13886	-7.72537	0.0883715	0.598027	Bacteria;100;Firmicutes; 98;Clostridia; 98;Clostridiales; 98;Lachnospiraceae; 98;Roseburia; 38
OTU_1539	0	0	8	0	0	0	-10.102	-10.7077	0.0902715	0.598027	Bacteria;100;Bacteroidetes; 98;Bacteroidetes; 98;Bacteroidales; 98;Bacteroidaceae; 98;Bacteroides; 98
OTU_6890	0	0	8	0	0	0	-9.96469	-10.7077	0.0902715	0.598027	Bacteria;100;Bacteroidetes; 96;Bacteroidetes; 94;Bacteroidales; 94;Bacteroidaceae; 90;Bacteroides; 90
OTU_1296	0	0	0	0	5	5	-9.46696	9.23853	0.0904567	0.598027	Bacteria;100;Proteobacteria;100;Gammaproteobacteria;100;Aeromonadales;100;Aeromonadaceae;100;Aeromonas;100
OTU_144	15	0	0	0	0	0	-9.47339	-10.7311	0.0907571	0.598027	Bacteria;100;Firmicutes; 99;Clostridia; 99;Clostridiales; 99;Lachnospiraceae; 99;Lachnospira; 79
OTU_20	15	0	0	0	0	0	-8.43053	-10.7311	0.0907571	0.598027	Bacteria;100;Bacteroidetes; 93;Bacteroidetes; 46;Bacteroidales; 46;Rikenellaceae; 23;Marinilabilia; 22
OTU_278	15	0	0	0	0	0	-8.43053	-10.7311	0.0907571	0.598027	Bacteria;100;Bacteroidetes; 93;Bacteroidetes; 79;Bacteroidales; 79;Porphyromonadaceae; 61;Paludibacter; 28
OTU_2262	1	0	2	0	0	0	-10.04	-9.50788	0.0909987	0.598027	Bacteria;100;Bacteroidetes; 97;Bacteroidetes; 93;Bacteroidales; 93;Bacteroidaceae; 92;Bacteroides; 92
OTU_2540	0	0	0	6	0	8	-8.49953	9.02393	0.091535	0.598027	Bacteria;100;Bacteroidetes;100;Flavobacteria;100;Flavobacteriales;100;Flavobacteriaceae;100;Chryseobacterium; 40
OTU_3793	0	27	0	0	0	0	-8.97218	-10.6241	0.0923773	0.598027	Bacteria;100;Proteobacteria;100;Betaproteobacteria;100;Methylophilales;100;Methylophilaceae;100;Methylophilus;100
OTU_775	0	0	0	0	20	0	-9.29331	10.4272	0.0940054	0.598027	Bacteria;100;Firmicutes;100;Clostridia;100;Clostridiales;100;Lachnospiraceae; 97;Dorea; 22
OTU_11137	2	0	1	0	0	0	-10.6709	-9.41054	0.0945718	0.598027	Bacteria;100;Firmicutes; 98;Clostridia; 98;Clostridiales; 98;Lachnospiraceae; 94;Dorea; 46
OTU_1837	2	0	1	0	0	0	-10.04	-9.41054	0.0945718	0.598027	Bacteria;100;Actinobacteria;100;Actinobacteria;100;Coriobacteriales;100;Coriobacteriaceae;100;Collinsella;100
OTU_2487	2	0	1	0	0	0	-10.04	-9.41054	0.0945718	0.598027	Bacteria;100;Firmicutes;100;Clostridia;100;Clostridiales;100;Ruminococcaceae;100;Faecalibacterium; 99
OTU_314	2	0	1	0	0	0	-11.1694	-9.41054	0.0945718	0.598027	Bacteria;100;Firmicutes; 96;Clostridia; 96;Clostridiales; 96;Ruminococcaceae; 93;Ruminococcaceae Incertae Sedis; 87
OTU_7426	3	2	0	0	0	0	-10.6796	-9.25107	0.0950206	0.598027	Bacteria;100;Proteobacteria;100;Alphaproteobacteria; 98;Sphingomonadales; 93;Sphingomonadaceae; 93;Sphingopyxis; 77
OTU_746	5	1	0	0	0	0	-10.4973	-9.60055	0.0950217	0.598027	Bacteria;100;Firmicutes; 97;Clostridia; 97;Clostridiales; 97;Ruminococcaceae; 97;Faecalibacterium; 27
OTU_9925	0	0	0	2	1	5	-10.2096	8.81267	0.0951673	0.598027	Bacteria;100;Bacteroidetes;100;Flavobacteria;100;Flavobacteriales;100;Flavobacteriaceae;100;Riemerella; 47
OTU_6907	0	0	0	3	4	0	-10.0982	9.10891	0.0954589	0.598027	Bacteria; 99;Bacteroidetes; 98;Bacteroidetes; 95;Bacteroidales; 95;Bacteroidaceae; 88;Bacteroides; 88
OTU_146	0	25	0	0	0	0	-8.96256	-10.5138	0.0957398	0.598027	Bacteria;100;Firmicutes; 97;Clostridia; 95;Clostridiales; 94;Lachnospiraceae; 94;Coprococcus; 31
OTU_1861	0	25	0	0	0	0	-7.91971	-10.5138	0.0957398	0.598027	Bacteria;100;Bacteroidetes;100;Bacteroidetes;100;Bacteroidales;100;Rikenellaceae;100;Alistipes;100
OTU_32	1	6	0	0	0	0	-10.3221	-9.22971	0.0958063	0.598027	Bacteria;100;Firmicutes; 66;Clostridia; 64;Clostridiales; 64;Ruminococcaceae; 48;Faecalibacterium; 44
OTU_3076	0	0	7	0	0	0	-10.3221	-10.5459	0.0960189	0.598027	Bacteria; 99;Firmicutes; 93;Bacilli; 88;Lactobacillales; 88;Streptococcaceae; 84;Lactococcus; 84
OTU_495	0	0	7	0	0	0	-10.0982	-10.5459	0.0960189	0.598027	Bacteria;100;Firmicutes; 88;Clostridia; 82;Clostridiales; 82;Lachnospiraceae; 54;Lachnobacterium; 26
OTU_1239	13	0	0	0	0	0	-9.20459	-10.5241	0.0971072	0.598027	Bacteria;100;Firmicutes; 99;Clostridia; 99;Clostridiales; 99;Lachnospiraceae; 99;Lachnospiraceae Incertae Sedis; 56
OTU_3695	0	0	0	0	6	3	-10.0708	9.34937	0.0983051	0.598027	Bacteria;100;Proteobacteria;100;Alphaproteobacteria;100;Rhizobiales;100;Methylocystaceae;100;Pleomorphomonas;100
